# Supplementary material for: Evidence-based recommendations for the rehabilitation and management of the ageing population with spinal cord injury: a systematic review of clinical practice guidelines
Source: PubMed Central journal article supplement — Eur J Phys Rehabil Med. 2024 Mar 29;60(3):433–44. doi: 10.23736/S1973-9087.24.08244-3 (PMC11255876; doi:10.23736/s1973-9087.24.08244-3), 2024-03-29
Supplement: Supplementary_Digital_Material2.pdf [file Supplementary_Digital_Material2.pdf]

SUPPLEMENTARY DIGITAL MATERIAL 2

Supplementary Table II.---Exemplary search strategy for PubMed.

| Search strategy for PubMed |                                                                                                                                                   |
|----------------------------|---------------------------------------------------------------------------------------------------------------------------------------------------|
| Search                     | Query                                                                                                                                             |
| #40                        | #38 AND #37 AND Filters*                                                                                                                          |
| #39                        | #38 AND #37                                                                                                                                       |
| #38                        | #35 OR #36                                                                                                                                        |
| #37                        | #27 OR #28 OR #29 OR #30 OR #31 OR #32 OR #33 OR #34                                                                                              |
| #36                        | #5 OR #6 OR #7 OR #8 OR #9 OR #10 OR #11 OR #12 OR #13 OR #14 OR #15 OR #16 OR #17 OR #18 OR #19 OR #20 OR #21 OR #22 OR #23 OR #24 OR #25 OR #26 |
| #35                        | #1 OR #2 OR #3 OR #4                                                                                                                              |
| #34                        | "Practice Guideline"[Publication Type]                                                                                                            |
| #33                        | Guideline[Publication Type]                                                                                                                       |
| #32                        | "Practice guideline*"[Title/Abstract]                                                                                                             |
| #31                        | "Clinical Guideline*"[Title/Abstract]                                                                                                             |
| #30                        | "Clinical Practice Guideline*"[Title/Abstract]                                                                                                    |
| #29                        | "Best practice*"[Title/Abstract]                                                                                                                  |
| #28                        | "Practice guidelines as topic"[Title/Abstract]                                                                                                    |
| #27                        | "Practice Guidelines as Topic"[MeSH Terms]                                                                                                        |
| #26                        | "Quadripares*"[Title/Abstract]                                                                                                                    |
| #25                        | "Tetraplegia*"[Title/Abstract]                                                                                                                    |
| #24                        | "Quadriplegia*"[Title/Abstract]                                                                                                                   |
| #23                        | "Brown sequard syndrom*"[Title/Abstract]                                                                                                          |
| #22                        | "Paraplegia*"[Title/Abstract]                                                                                                                     |
| #21                        | "Whiplash Injur*"[Title/Abstract]                                                                                                                 |
| #20                        | "Syringomyelia*"[Title/Abstract]                                                                                                                  |
| #19                        | "Spinal Cord Neoplasm*"[Title/Abstract]                                                                                                           |
| #18                        | "Spinal Cord Compression*"[Title/Abstract]                                                                                                        |
| #17                        | "Myelitis"[Title/Abstract]                                                                                                                        |
| #16                        | "Cervical Myelopath*"[Title/Abstract]                                                                                                             |
| #15                        | "Myelopath*"[Title/Abstract]                                                                                                                      |
| #14                        | "Spinal Cord Disorder*"[Title/Abstract]                                                                                                           |
| #13                        | "Spinal Cord Disease*"[Title/Abstract]                                                                                                            |
| #12                        | "Central Cord Syndrome*"[Title/Abstract]                                                                                                          |
| #11                        | "Spinal Cord Contusion*"[Title/Abstract]                                                                                                          |
| #10                        | "Post Traumatic Myelopath*"[Title/Abstract]                                                                                                       |
| #9                         | "Spinal Cord Laceration*"[Title/Abstract]                                                                                                         |
| #8                         | "Spinal Cord Transection*"[Title/Abstract]                                                                                                        |
| #7                         | "Spinal Cord Injur*"[Title/Abstract]                                                                                                              |
| #6                         | "Traumatic Myelopath*"[Title/Abstract]                                                                                                            |
| #5                         | "Spinal Cord Trauma*"[Title/Abstract]                                                                                                             |
| #4                         | "Quadriplegia"[MeSH Terms]                                                                                                                        |
| #3                         | "Paraplegia"[MeSH Terms]                                                                                                                          |
| #2                         | "Spinal Cord Diseases"[MeSH Terms]                                                                                                                |
| #1                         | "Spinal Cord Injuries"[MeSH Terms]                                                                                                                |
|                            |                                                                                                                                                   |
|                            | *Filters: English, German, from 2012/1/1 - 2022/28/12                                                                                             |
