# Supplementary material for: Evidence-based recommendations for the rehabilitation and management of the ageing population with spinal cord injury: a systematic review of clinical practice guidelines
Source: PubMed Central journal article supplement — Eur J Phys Rehabil Med. 2024 Mar 29;60(3):433–44. doi: 10.23736/S1973-9087.24.08244-3 (PMC11255876; doi:10.23736/s1973-9087.24.08244-3), 2024-03-29
Supplement: Supplementary_Digital_Material3.pdf [file Supplementary_Digital_Material3.pdf]

SUPPLEMENTARY DIGITAL MATERIAL 3

Supplementary Table III.---List of all identified Clinical Practice Guidelines.

| <b>Identified clinical Practice Guidelines</b> |                                                                                                                                                                                                                                                                                                                                                                                                                                      |                                                                                                                                                                                                             |             |                                                                                                                                                                                                                                       |
|------------------------------------------------|--------------------------------------------------------------------------------------------------------------------------------------------------------------------------------------------------------------------------------------------------------------------------------------------------------------------------------------------------------------------------------------------------------------------------------------|-------------------------------------------------------------------------------------------------------------------------------------------------------------------------------------------------------------|-------------|---------------------------------------------------------------------------------------------------------------------------------------------------------------------------------------------------------------------------------------|
| <b>From databases</b>                          |                                                                                                                                                                                                                                                                                                                                                                                                                                      |                                                                                                                                                                                                             |             |                                                                                                                                                                                                                                       |
| <b>N°</b>                                      | <b>Title</b>                                                                                                                                                                                                                                                                                                                                                                                                                         | <b>Author</b>                                                                                                                                                                                               | <b>Year</b> | <b>Source Link</b>                                                                                                                                                                                                                    |
| <b>1</b>                                       | Systematic review and practice policy statements on urinary tract infection prevention in adults with spina bifida                                                                                                                                                                                                                                                                                                                   | Tradewell, M. and Pariser, J.J. and Nimeh, T. and Elliott, S.P.                                                                                                                                             | 2018        | <a href="https://www.embase.com/search/results?subaction=viewrecord&amp;id=L622364064&amp;from=export_U2-L622364064">https://www.embase.com/search/results?subaction=viewrecord&amp;id=L622364064&amp;from=export_U2 - L622364064</a> |
| <b>2</b>                                       | Prioritization of risk situations in neuro-urology: guidelines from Association Française d'Urologie (AFU), Association Francophone Internationale des Groupes d'Animation de la Paraplégie (A.F.I.G.A.P.), Groupe de Neuro-urologie de Langue Française (GENULF), Société Française de Médecine Physique et de Réadaptation (SOFMER) and Société Interdisciplinaire Francophone d'UroDynamique et de Pelvi-Périnéologie (SIFUD-PP). | Hentzen C and Biardeau X and Turmel N and Haddad R and Bey E and Amarenco G and Denys P and Phé V and Perrouin-Verbe MA and Peyronnet B and Jousain C                                                       | 2022        | <a href="https://pubmed.ncbi.nlm.nih.gov/34402945/">https://pubmed.ncbi.nlm.nih.gov/34402945/</a>                                                                                                                                     |
| <b>3</b>                                       | Development of a swallowing risk screening tool and best practice recommendations for the management of oropharyngeal dysphagia following acute cervical spinal cord injury: an international multi-professional Delphi consensus.                                                                                                                                                                                                   | McRae J and Smith C and Beeke S and Emmanuel A                                                                                                                                                              | 2022        | <a href="https://pubmed.ncbi.nlm.nih.gov/34904488/">https://pubmed.ncbi.nlm.nih.gov/34904488/</a>                                                                                                                                     |
| <b>4</b>                                       | Identification and Management of Cardiometabolic Risk after Spinal Cord Injury: Clinical Practice Guideline for Health Care Providers.                                                                                                                                                                                                                                                                                               | Nash MS and Groah SL and Gater DR Jr and Dyson-Hudson TA and Lieberman JA and Myers J and Sabharwal S and Taylor AJ                                                                                         | 2018        | <a href="https://pubmed.ncbi.nlm.nih.gov/30459501/">https://pubmed.ncbi.nlm.nih.gov/30459501/</a>                                                                                                                                     |
| <b>5</b>                                       | Clinical Practice Guideline for the Management of Asymptomatic Bacteriuria: 2019 Update by the Infectious Diseases Society of America.                                                                                                                                                                                                                                                                                               | Nicolle LE and Gupta K and Bradley SF and Colgan R and DeMuri GP and Drekonja D and Eckert LO and Geerlings SE and Köves B and Hooton TM and Juthani-Mehta M and Knight SL and Saint S and Schaeffer AJ and | 2019        | <a href="https://pubmed.ncbi.nlm.nih.gov/31506700/">https://pubmed.ncbi.nlm.nih.gov/31506700/</a>                                                                                                                                     |

|   |                                                                                                                                                                                      |                                                                                                                                                                                                                                                                                                                                                                                                                                                                        |      |                                                                                                   |
|---|--------------------------------------------------------------------------------------------------------------------------------------------------------------------------------------|------------------------------------------------------------------------------------------------------------------------------------------------------------------------------------------------------------------------------------------------------------------------------------------------------------------------------------------------------------------------------------------------------------------------------------------------------------------------|------|---------------------------------------------------------------------------------------------------|
|   |                                                                                                                                                                                      | Trautner B and Wullt B and Siemieniuk R                                                                                                                                                                                                                                                                                                                                                                                                                                |      |                                                                                                   |
| 6 | A Clinical Practice Guideline for the Management of Patients With Acute Spinal Cord Injury: Recommendations on the Type and Timing of Rehabilitation.                                | Fehlings MG and Tetreault LA and Aarabi B and Anderson P and Arnold PM and Brodke DS and Chiba K and Dettori JR and Furlan JC and Harrop JS and Hawryluk G and Holly LT and Howley S and Jeji T and Kalsi-Ryan S and Kotter M and Kurpad S and Kwon BK and Marino RJ and Martin AR and Massicotte E and Merli G and Middleton JW and Nakashima H and Nagoshi N and Palmieri K and Singh A and Skelly AC and Tsai EC and Vaccaro A and Wilson JR and Yee A and Burns AS | 2017 | <a href="https://pubmed.ncbi.nlm.nih.gov/29164029/">https://pubmed.ncbi.nlm.nih.gov/29164029/</a> |
| 7 | Acute Lower Extremity Fracture Management in Chronic Spinal Cord Injury: 2022 Delphi Consensus Recommendations.                                                                      | Carbone LD and Ahn J and Adler RA and Cervinka T and Craven C and Geerts W and Hsu JR and Huang D and Karunakar MA and Kiratli BJ and Krause PC and Morse LR and Mirick Mueller GE and Nana A and Rogers E and Rivera JC and Spitler C and Weaver FM and Obrebsky W                                                                                                                                                                                                    | 2022 | <a href="https://pubmed.ncbi.nlm.nih.gov/36518619/">https://pubmed.ncbi.nlm.nih.gov/36518619/</a> |
| 8 | Psychological Treatments and Psychotherapies in the Neurorehabilitation of Pain: Evidences and Recommendations from the Italian Consensus Conference on Pain in Neurorehabilitation. | Castelnuovo G and Giusti EM and Manzoni GM and Saviola D and Gatti A and Gabrielli S and Lacerenza M and Pietrabissa G and Cattivelli R and Spatola CA and Corti S and Novelli M and Villa V and Cottini A and Lai C and Pagnini F and Castelli L and Tavola M and Torta R and Arreghini M and Zanini L and Brunani A and Capodaglio                                                                                                                                   | 2016 | <a href="https://pubmed.ncbi.nlm.nih.gov/26924998/">https://pubmed.ncbi.nlm.nih.gov/26924998/</a> |

|           |                                                                                                                                                                                      |                                                                                                                                                                                                                           |      |                                                                                                                                                                                                                            |
|-----------|--------------------------------------------------------------------------------------------------------------------------------------------------------------------------------------|---------------------------------------------------------------------------------------------------------------------------------------------------------------------------------------------------------------------------|------|----------------------------------------------------------------------------------------------------------------------------------------------------------------------------------------------------------------------------|
|           |                                                                                                                                                                                      | P and D'Aniello GE and Scarpina F and Brioschi A and Priano L and Mauro A and Riva G and Repetto C and Regalia C and Molinari E and Notaro P and Paolucci S and Sandrini G and Simpson SG and Wiederhold B and Tamburin S |      |                                                                                                                                                                                                                            |
| <b>9</b>  | Management of Mental Health Disorders, Substance Use Disorders, and Suicide in Adults with Spinal Cord Injury: Clinical Practice Guideline for Health Care Providers                 | Bombardier et al                                                                                                                                                                                                          | 2021 | <a href="https://www.embase.com/search/results?subaction=viewrecord&amp;id=L2010579838&amp;from=export">https://www.embase.com/search/results?subaction=viewrecord&amp;id=L2010579838&amp;from=export</a> U2 - L2010579838 |
| <b>10</b> | Prevention of Venous Thromboembolism in Individuals with Spinal Cord Injury: Clinical Practice Guidelines for Health Care Providers, 3rd ed.: Consortium for Spinal Cord Medicine.   | Consortium for Spinal Cord Medicine                                                                                                                                                                                       | 2016 | <a href="https://pubmed.ncbi.nlm.nih.gov/29339863/">https://pubmed.ncbi.nlm.nih.gov/29339863/</a>                                                                                                                          |
| <b>11</b> | Interventional management of neuropathic pain: NeuPSIG recommendations.                                                                                                              | Dworkin RH and O'Connor AB and Kent J and Mackey SC and Raja SN and Stacey BR and Levy RM and Backonja M and Baron R and Harke H and Loeser JD and Treede RD and Turk DC and Wells CD                                     | 2013 | <a href="https://pubmed.ncbi.nlm.nih.gov/23748119/">https://pubmed.ncbi.nlm.nih.gov/23748119/</a>                                                                                                                          |
| <b>12</b> | Neurogenic bowel dysfunction: Clinical management recommendations of the Neurologic Incontinence Committee of the Fifth International Consultation on Incontinence 2013.             | Cotterill N and Madersbacher H and Wyndaele JJ and Apostolidis A and Drake MJ and Gajewski J and Heesakkers J and Panicker J and Radziszewski P and Sakakibara R and Sievert KD and Hamid R and Kessler TM and Emmanuel A | 2018 | <a href="https://pubmed.ncbi.nlm.nih.gov/28640977/">https://pubmed.ncbi.nlm.nih.gov/28640977/</a>                                                                                                                          |
| <b>13</b> | Evidence-based position paper on Physical and Rehabilitation Medicine (PRM) professional practice for persons with spinal cord injury. The European PRM position (UEMS PRM Section). | Rapidi CA and Tederko P and Moslavac S and Popa D and Branco CA and Kiekens C and Varela Donoso E and Christodoulou N                                                                                                     | 2018 | <a href="https://pubmed.ncbi.nlm.nih.gov/29952157/">https://pubmed.ncbi.nlm.nih.gov/29952157/</a>                                                                                                                          |
| <b>14</b> | Rehabilitation of people with spinal cord damage due to tumor: literature review, international                                                                                      | New PW and Marshall R and Stubblefield MD and Scivoletto G                                                                                                                                                                | 2017 | <a href="https://pubmed.ncbi.nlm.nih.gov/27088581/">https://pubmed.ncbi.nlm.nih.gov/27088581/</a>                                                                                                                          |

|           |                                                                                                                                             |                                                                                                                                                                                                                                                                                                                                                                                                                             |      |                                                                                                                                                                                                                                       |
|-----------|---------------------------------------------------------------------------------------------------------------------------------------------|-----------------------------------------------------------------------------------------------------------------------------------------------------------------------------------------------------------------------------------------------------------------------------------------------------------------------------------------------------------------------------------------------------------------------------|------|---------------------------------------------------------------------------------------------------------------------------------------------------------------------------------------------------------------------------------------|
|           | survey and practical recommendations for optimizing their rehabilitation.                                                                   |                                                                                                                                                                                                                                                                                                                                                                                                                             |      |                                                                                                                                                                                                                                       |
| <b>15</b> | Neurogenic bowel management in adults with spinal cord injury-new clinical practice guidelines from the consortium for spinal cord medicine | Johns, J. and Wilson, C. and Laredo, R. and Heinen, M. and Rodriguez, G.                                                                                                                                                                                                                                                                                                                                                    | 2019 | <a href="https://www.embase.com/search/results?subaction=viewrecord&amp;id=L631879388&amp;from=export_U2-L631879388">https://www.embase.com/search/results?subaction=viewrecord&amp;id=L631879388&amp;from=export_U2 - L631879388</a> |
| <b>16</b> | Clinical guidelines for the diagnosis and treatment of lower urinary tract dysfunction in patients with spinal cord injury.                 | Sekido N and Igawa Y and Kakizaki H and Kitta T and Sengoku A and Takahashi S and Takahashi R and Tanaka K and Namima T and Honda M and Mitsui T and Yamanishi T and Watanabe T                                                                                                                                                                                                                                             | 2020 | <a href="https://pubmed.ncbi.nlm.nih.gov/32077161/">https://pubmed.ncbi.nlm.nih.gov/32077161/</a>                                                                                                                                     |
| <b>17</b> | Clinical Practice Guideline to Improve Locomotor Function Following Chronic Stroke, Incomplete Spinal Cord Injury, and Brain Injury.        | Hornby TG and Reisman DS and Ward IG and Scheets PL and Miller A and Haddad D and Fox EJ and Fritz NE and Hawkins K and Henderson CE and Hendron KL and Holleran CL and Lynskey JE and Walter A                                                                                                                                                                                                                             | 2020 | <a href="https://pubmed.ncbi.nlm.nih.gov/31834165/">https://pubmed.ncbi.nlm.nih.gov/31834165/</a>                                                                                                                                     |
| <b>18</b> | Evidence-based scientific exercise guidelines for adults with spinal cord injury: an update and a new guideline.                            | Martin Ginis KA and van der Scheer JW and Latimer-Cheung AE and Barrow A and Bourne C and Carruthers P and Bernardi M and Ditor DS and Gaudet S and de Groot S and Hayes KC and Hicks AL and Leicht CA and Lexell J and Macaluso S and Manns PJ and McBride CB and Noonan VK and Pomerleau P and Rimmer JH and Shaw RB and Smith B and Smith KM and Steeves JD and Tussler D and West CR and Wolfe DL and Goosey-Tolfrey VL | 2018 | <a href="https://pubmed.ncbi.nlm.nih.gov/29070812/">https://pubmed.ncbi.nlm.nih.gov/29070812/</a>                                                                                                                                     |
| <b>19</b> | Urodynamics in patients with spinal cord injury: A clinical review and best practice paper by a working                                     | Schurch B and Iacovelli V and Averbeck MA and Stefano C and Altaweel W and Finazzi Agrò E                                                                                                                                                                                                                                                                                                                                   | 2018 | <a href="https://pubmed.ncbi.nlm.nih.gov/28762566/">https://pubmed.ncbi.nlm.nih.gov/28762566/</a>                                                                                                                                     |

---

group of The International Continence Society  
Urodynamics Committee.

|           |                                                                                                                                                             |                                                                                                                                                                                                                                                                                                                                                                                                                                         |      |                                                                                                                                                                                                                         |
|-----------|-------------------------------------------------------------------------------------------------------------------------------------------------------------|-----------------------------------------------------------------------------------------------------------------------------------------------------------------------------------------------------------------------------------------------------------------------------------------------------------------------------------------------------------------------------------------------------------------------------------------|------|-------------------------------------------------------------------------------------------------------------------------------------------------------------------------------------------------------------------------|
| <b>20</b> | The CanPain SCI Clinical Practice Guideline for Rehabilitation Management of Neuropathic Pain after Spinal Cord: recommendations for model systems of care. | Guy SD and Mehta S and Harvey D and Lau B and Middleton JW and O'Connell C and Townson A and Truchon C and Wolfe D and Bradbury CL and Bryce TN and Casalino A and Côté I and Craven BC and Finnerup NB and Hitzig SL and Kras-Dupuis A and Moulin DE and Orenczuk S and Parrent AG and Potter P and Siddall PJ and Short C and Teasell R and Widerström-Noga E and Loh E                                                               | 2016 | <a href="https://pubmed.ncbi.nlm.nih.gov/27444716/">https://pubmed.ncbi.nlm.nih.gov/27444716/</a>                                                                                                                       |
| <b>21</b> | The CanPain SCI Clinical Practice Guidelines for Rehabilitation Management of Neuropathic Pain after Spinal Cord: Screening and diagnosis recommendations   | Mehta, S. and Guy, S.D. and Bryce, T.N. and Craven, B.C. and Finnerup, N.B. and Hitzig, S.L. and Orenczuk, S. and Siddall, P.J. and Widerström-Noga, E. and Casalino, A. and Côté, I. and Harvey, D. and Kras-Dupuis, A. and Lau, B. and Middleton, J.W. and Moulin, D.E. and O'Connell, C. and Parrent, A.G. and Potter, P. and Short, C. and Teasell, R. and Townson, A. and Truchon, C. and Wolfe, D. and Bradbury, C.L. and Loh, E. | 2016 | <a href="https://www.embase.com/search/results?subaction=viewrecord&amp;id=L611397507&amp;from=export">https://www.embase.com/search/results?subaction=viewrecord&amp;id=L611397507&amp;from=export</a> U2 - L611397507 |
| <b>22</b> | The CanPain SCI clinical practice guidelines for rehabilitation management of neuropathic pain after spinal cord injury: 2021 update.                       | Loh E and Mirkowski M and Agudelo AR and Allison DJ and Benton B and Bryce TN and Guilcher S and Jeji T and Kras-Dupuis A and Kreutzwiser D and Lanizi O and Lee-Tai-Fuy G and Middleton JW and Moulin DE and O'Connell C and Orenczuk S and Potter P and Short C and Teasell R and                                                                                                                                                     | 2022 | <a href="https://pubmed.ncbi.nlm.nih.gov/35124700/">https://pubmed.ncbi.nlm.nih.gov/35124700/</a>                                                                                                                       |

---

---

Townson A and Widerström-Noga E  
and Wolfe DL and Xia N and Mehta S

---

**From grey literature**

|           |                                                                                                                                                                                                                                                                |                                                                                                                                                                                                                    |      |                                                                                                                                                                                         |
|-----------|----------------------------------------------------------------------------------------------------------------------------------------------------------------------------------------------------------------------------------------------------------------|--------------------------------------------------------------------------------------------------------------------------------------------------------------------------------------------------------------------|------|-----------------------------------------------------------------------------------------------------------------------------------------------------------------------------------------|
| <b>23</b> | Rehabilitation after traumatic injury                                                                                                                                                                                                                          | NICE guideline                                                                                                                                                                                                     | 2022 | <a href="http://www.nice.org.uk/guidance/ng211">www.nice.org.uk/guidance/ng211</a>                                                                                                      |
| <b>24</b> | Canadian Spinal Cord Injury Practice (Can-SCIP) Guideline                                                                                                                                                                                                      | Bayley et al.                                                                                                                                                                                                      | 2021 | <a href="https://kite-uhn.com/can-scip/recommendations">https://kite-uhn.com/can-scip/recommendations</a>                                                                               |
| <b>25</b> | Best Practice Guidelines: Spine Injury                                                                                                                                                                                                                         | American College of Surgeons                                                                                                                                                                                       | 2022 | <a href="https://www.facs.org/media/k45gikqv/spine_injury_guidelines.pdf">https://www.facs.org/media/k45gikqv/spine_injury_guidelines.pdf</a>                                           |
| <b>26</b> | Guidelines: neurogenic bowel dysfunction in spinal cord injury (long version) / Leitlinie: Neurogene Darmfunktionsstörung bei Querschnittlähmung (Langfassung)                                                                                                 | Geng V., Böthig R., Hildesheim A., Kurze I., Leder E.D.                                                                                                                                                            | 2020 | <a href="https://link.springer.com/article/10.1007/s00053-020-00482-5">https://link.springer.com/article/10.1007/s00053-020-00482-5</a>                                                 |
| <b>27</b> | Diagnostik und Therapie von neurogenen Blasenstörungen                                                                                                                                                                                                         | Haensch et al                                                                                                                                                                                                      | 2020 | <a href="https://register.awmf.org/de/leitlinien/detail/030-121">https://register.awmf.org/de/leitlinien/detail/030-121</a>                                                             |
| <b>28</b> | Langzeitanwendung von Opioiden bei chronischen nicht-tumorbedingten Schmerzen: Empfehlungen der zweiten Aktualisierung der Leitlinie LONTS (Long-term opioid therapy for chronic noncancer pain: Recommendations of the second update of the LONTS guidelines) | Häuser W., Bock F., Hüppe M., Nothacker M., Norda H., Radbruch L., Schiltenswolf M., Schuler M., Tölle T., Viniol A., Petzke F. und Koautoren für die Konsensusgruppe der 2. Aktualisierung der S3-Leitlinie LONTS |      | <a href="https://link.springer.com/article/10.1007/s00482-020-00472-y">https://link.springer.com/article/10.1007/s00482-020-00472-y</a>                                                 |
| <b>29</b> | Nichtinvasive und invasive Beatmung als Therapie der chronischen respiratorischen Insuffizienz                                                                                                                                                                 | Windisch et al.                                                                                                                                                                                                    | 2017 | <a href="https://register.awmf.org/de/leitlinien/detail/020-008">https://register.awmf.org/de/leitlinien/detail/020-008</a>                                                             |
| <b>30</b> | Schwangerschaft, Geburt und Wochenbett bei Frauen mit Querschnittlähmung                                                                                                                                                                                       | Bertschy und Lange et al.                                                                                                                                                                                          | 2018 | <a href="https://www.researchgate.net/publication/331111111">Guidelines-Schwangerschaft-Geburt-und-Wochenbett-bei-Frauen-mit-Querschnittlaehmung-Langfassung.pdf (researchgate.net)</a> |
| <b>31</b> | S2k-Leitlinie Prolongiertes Weaning                                                                                                                                                                                                                            | Schönhofer et al.                                                                                                                                                                                                  | 2019 | <a href="https://register.awmf.org/de/leitlinien/detail/020-015">https://register.awmf.org/de/leitlinien/detail/020-015</a>                                                             |
| <b>32</b> | Evaluation and Management of Autonomic Dysreflexia and Other Autonomic Dysfunctions                                                                                                                                                                            |                                                                                                                                                                                                                    | 2019 | <a href="https://pva.org/research-resources/publications/clinical-practice-guidelines/or">https://pva.org/research-resources/publications/clinical-practice-guidelines/or</a>           |

---

|           |                                                                                                                                                                                                                                                                                                                 |                            |      |                                                                                                                                                                           |
|-----------|-----------------------------------------------------------------------------------------------------------------------------------------------------------------------------------------------------------------------------------------------------------------------------------------------------------------|----------------------------|------|---------------------------------------------------------------------------------------------------------------------------------------------------------------------------|
|           |                                                                                                                                                                                                                                                                                                                 |                            |      | <a href="https://www.ncbi.nlm.nih.gov/pmc/articles/PMC8152175/">https://www.ncbi.nlm.nih.gov/pmc/articles/PMC8152175/</a>                                                 |
| <b>33</b> | Pressure Ulcer Prevention and Treatment Following Spinal Cord Injury, 2nd edition                                                                                                                                                                                                                               |                            | 2014 | <a href="https://pva.org/research-resources/publications/clinical-practice-guidelines/">https://pva.org/research-resources/publications/clinical-practice-guidelines/</a> |
| <b>34</b> | Bone Health and Osteoporosis Management In Individuals With Spinal Cord Injury                                                                                                                                                                                                                                  |                            | 2019 | <a href="https://pva.org/research-resources/publications/clinical-practice-guidelines/">https://pva.org/research-resources/publications/clinical-practice-guidelines/</a> |
| <b>35</b> | S2e-Leitlinie Ergebniserhebung in der Erstbehandlung nach neu erworbener Querschnittlähmung (Result survey in the initial treatment after newly acquired paraplegia)                                                                                                                                            | Scheel-Sailer et al.       | 2020 | <a href="https://register.awmf.org/de/leitlinien/detail/179-012">https://register.awmf.org/de/leitlinien/detail/179-012</a>                                               |
| <b>36</b> | S2k-Leitlinie Lebenslange Nachsorge für Menschen mit Querschnittlähmung (Lifelong follow-up care for people with spinal cord injury) (Details to the literature search can also be found in: Evidence based clinical practice guideline for follow-up care after spinal cord injury (2022 --> rayyan 919410107) | Weidner and Eriks-Hoogland | 2022 | <a href="https://register.awmf.org/de/leitlinien/detail/179-014">https://register.awmf.org/de/leitlinien/detail/179-014</a>                                               |
| <b>37</b> | S2e-Leitlinie Rehabilitation der unteren Extremität, der Steh- und Gehfunktion bei Menschen mit Querschnittlähmung (Rehabilitation of the lower extremity, the standing and walking function in people with paraplegia)                                                                                         | Scheel-Sailer              | 2018 | <a href="https://register.awmf.org/de/leitlinien/detail/179-009">https://register.awmf.org/de/leitlinien/detail/179-009</a>                                               |
| <b>38</b> | S2k-Leitlinie Atmung, Atemunterstützung und Beatmung bei akuter und chronischer Querschnittlähmung (Breathing, respiratory support and ventilation in acute and chronic paraplegia)                                                                                                                             | Weidner und Michel         | 2022 | <a href="https://register.awmf.org/de/leitlinien/detail/179-011">https://register.awmf.org/de/leitlinien/detail/179-011</a>                                               |
| <b>39</b> | Verbesserung der Funktionsfähigkeit der oberen Extremitäten bei zervikaler Querschnittlähmung (Improvement of the functionality of the upper extremities in cervical paraplegia)                                                                                                                                | Weidner and Sigrist-Nix    | 2020 | <a href="https://register.awmf.org/de/leitlinien/detail/179-013">https://register.awmf.org/de/leitlinien/detail/179-013</a>                                               |

|           |                                                                                                                                              |                                                                                          |      |                                                                                                                                                                                                                                                                                                                                                                                          |
|-----------|----------------------------------------------------------------------------------------------------------------------------------------------|------------------------------------------------------------------------------------------|------|------------------------------------------------------------------------------------------------------------------------------------------------------------------------------------------------------------------------------------------------------------------------------------------------------------------------------------------------------------------------------------------|
| <b>40</b> | Urinary incontinence in neurological disease: assessment and management                                                                      | NICE guideline                                                                           | 2012 | <a href="https://www.nice.org.uk/guidance/cg148">https://www.nice.org.uk/guidance/cg148</a>                                                                                                                                                                                                                                                                                              |
| <b>41</b> | S2k-Leitlinie Therapie des spastischen Syndroms                                                                                              | Platz et al.                                                                             | 2018 | <a href="https://register.awmf.org/de/leitlinien/detail/030-078">https://register.awmf.org/de/leitlinien/detail/030-078</a>                                                                                                                                                                                                                                                              |
| <b>42</b> | The Prevention and Management of Pressure Ulcers in Primary and Secondary Care                                                               | NICE                                                                                     | 2014 | <a href="https://pubmed.ncbi.nlm.nih.gov/25340232/">https://pubmed.ncbi.nlm.nih.gov/25340232/</a>                                                                                                                                                                                                                                                                                        |
| <b>43</b> | AUA/SUFU Guidelines: Urodynamics                                                                                                             | Winters et al.                                                                           | 2012 | <a href="https://www.sciencedirect.com/science/article/abs/pii/S0022534712049610">https://www.sciencedirect.com/science/article/abs/pii/S0022534712049610</a>                                                                                                                                                                                                                            |
| <b>44</b> | EAU Guidelines on Neuro-Urology                                                                                                              | Blok, Diaz, Popolo et al                                                                 | 2022 | <a href="https://d56bochluxqnz.cloudfront.net/documents/full-guideline/EAU-Guidelines-on-Neuro-Urology-2022.pdf">https://d56bochluxqnz.cloudfront.net/documents/full-guideline/EAU-Guidelines-on-Neuro-Urology-2022.pdf</a> (guideline)<br><a href="https://uroweb.org/guidelines">https://uroweb.org/guidelines</a> (website)                                                           |
| <b>45</b> | Canadian Urological Association guideline: Diagnosis, management, and surveillance of neurogenic lower urinary tract dysfunction – Full text | Kavanagh et al                                                                           | 2019 | <a href="https://cuaj.ca/index.php/journal/article/view/5912/4109">https://cuaj.ca/index.php/journal/article/view/5912/4109</a>                                                                                                                                                                                                                                                          |
| <b>46</b> | Guide for Health Professionals on the Psychosocial Care of Adults with Spinal Cord Injury                                                    | Agency for Clinical Innovation                                                           | 2014 | <a href="https://aci.health.nsw.gov.au/__data/assets/pdf_file/0019/155233/Guide-Psychosocial-Care.pdf">https://aci.health.nsw.gov.au/__data/assets/pdf_file/0019/155233/Guide-Psychosocial-Care.pdf</a>                                                                                                                                                                                  |
| <b>47</b> | Clinical Guideline for Standing Adults Following Spinal Cord Injury                                                                          | Spinal Cord Injury Centre<br>Physiotherapy Lead Clinicians<br>United Kingdom and Ireland | 2019 | <a href="https://www.mascip.co.uk/best-practice/mascip-best-practice/">https://www.mascip.co.uk/best-practice/mascip-best-practice/</a> (website)<br><a href="https://www.mascip.co.uk/wp-content/uploads/2020/09/SCI-Standing-Clinical-Guidelines-Report-2019.pdf">https://www.mascip.co.uk/wp-content/uploads/2020/09/SCI-Standing-Clinical-Guidelines-Report-2019.pdf</a> (guideline) |
| <b>48</b> | MASCIP Guidelines for Weight Management in Individuals with Spinal Cord Injury                                                               | Wong et al                                                                               | 2019 | <a href="https://www.mascip.co.uk/best-practice/mascip-best-practice/">https://www.mascip.co.uk/best-practice/mascip-best-practice/</a> (website)<br><a href="https://www.mascip.co.uk/wp-content/uploads/2019/10/03-May-">https://www.mascip.co.uk/wp-content/uploads/2019/10/03-May-</a>                                                                                               |



|    |                                                                                                                                                                                                                                                                                                                                                                                                                                                                                                                                                       |                                                                      |      |                                                                                                                                                                                                                            |
|----|-------------------------------------------------------------------------------------------------------------------------------------------------------------------------------------------------------------------------------------------------------------------------------------------------------------------------------------------------------------------------------------------------------------------------------------------------------------------------------------------------------------------------------------------------------|----------------------------------------------------------------------|------|----------------------------------------------------------------------------------------------------------------------------------------------------------------------------------------------------------------------------|
|    |                                                                                                                                                                                                                                                                                                                                                                                                                                                                                                                                                       |                                                                      |      | 2018-Wong-et-al-MASCIP-Weight-Management-Guidelines-for-People-with-a-Spinal-Cord-Injury.pdf (guideline)                                                                                                                   |
| 49 | Prevention of VTE in non-orthopedic surgical patients. Antithrombotic Therapy and Prevention of Thrombosis, 9th ed: American College of Chest Physicians Evidence-Based Clinical Practice Guidelines.<br><br>Methodology: Guyatt GH, Norris SL, Schulman S, et al. 2012. Methodology for the development of antithrombotic therapy and prevention of thrombosis guidelines. Antithrombotic Therapy and Prevention of Thrombosis, 9th ed.: American College of Chest Physicians EvidenceBased Clinical Practice Guidelines. Chest;141(2 Suppl):53S–70S | Gould MK, Garcia DA, Wren SM, et al                                  | 2012 | <a href="https://pubmed.ncbi.nlm.nih.gov/22315263/">https://pubmed.ncbi.nlm.nih.gov/22315263/</a><br><br>Methodology:<br><a href="https://pubmed.ncbi.nlm.nih.gov/22315256/">https://pubmed.ncbi.nlm.nih.gov/22315256/</a> |
| 50 | A Core Set of Outcome Measures for Adults With Neurologic Conditions Undergoing Rehabilitation: A CLINICAL PRACTICE GUIDELINE                                                                                                                                                                                                                                                                                                                                                                                                                         | Moore JL, Potter K, Blankshain K, Kaplan SL, O'Dwyer LC, Sullivan JE | 2018 | <a href="https://pubmed.ncbi.nlm.nih.gov/29901487/">https://pubmed.ncbi.nlm.nih.gov/29901487/</a>                                                                                                                          |
| 51 | Special considerations in the urological management of the older spinal cord injury patient                                                                                                                                                                                                                                                                                                                                                                                                                                                           | Chan et al                                                           | 2018 | <a href="https://doi.org/10.1007/s00345-018-2326-3">https://doi.org/10.1007/s00345-018-2326-3</a>                                                                                                                          |
| 52 | Canadian Best Practice Guidelines for the Prevention and Management of Pressure Ulcers in People With Spinal Cord Injury: A Resource Handbook for Clinicians                                                                                                                                                                                                                                                                                                                                                                                          | Houghton PE, Campbell KE et al.                                      | 2013 | <a href="http://www.onf.org">www.onf.org</a>                                                                                                                                                                               |
