# Supplementary material for: Evidence-based recommendations for the rehabilitation and management of the ageing population with spinal cord injury: a systematic review of clinical practice guidelines
Source: PubMed Central journal article supplement — Eur J Phys Rehabil Med. 2024 Mar 29;60(3):433–44. doi: 10.23736/S1973-9087.24.08244-3 (PMC11255876; doi:10.23736/s1973-9087.24.08244-3), 2024-03-29
Supplement: Supplementary_Digital_Material4.pdf [file Supplementary_Digital_Material4.pdf]

SUPPLEMENTARY DIGITAL MATERIAL 4

Supplementary Table IV.—Characteristics of included clinical practice guidelines.

| Nr. | Short Title                                      | Full title                                                                                                                                     | Year | Author                                                                                                                         | Country                       | Objective                                                                                                                                                                                                                                                                                                                                                                      | Scope          | Target user                                                                                                          | Target population <sup>a</sup>                           | Care continuum   | Care setting            | N (.rec) <sup>b</sup> |
|-----|--------------------------------------------------|------------------------------------------------------------------------------------------------------------------------------------------------|------|--------------------------------------------------------------------------------------------------------------------------------|-------------------------------|--------------------------------------------------------------------------------------------------------------------------------------------------------------------------------------------------------------------------------------------------------------------------------------------------------------------------------------------------------------------------------|----------------|----------------------------------------------------------------------------------------------------------------------|----------------------------------------------------------|------------------|-------------------------|-----------------------|
| 1   | NICE_Rehabilitation, 2022                        | Rehabilitation after traumatic injury                                                                                                          | 2022 | National Institute for Health and Care Excellence (NICE)                                                                       | UK                            | Offer clinical guidance for the rehabilitation of individuals with complex rehabilitation needs after traumatic injury <sup>c</sup>                                                                                                                                                                                                                                            | Comprehensive  | Health care workers<br>Social care workers<br>Individuals with SCI<br>Family and caregivers<br>Others <sup>d</sup>   | TSCI and others                                          | Acute<br>Chronic | Inpatient<br>Outpatient | 8 (1-8)               |
| 2   | Consortium_Bone health, 2022                     | Bone health and osteoporosis management in individuals with spinal cord injury                                                                 | 2022 | Paralyzed Veterans of America and Consortium for Spinal Cord Medicine                                                          | USA                           | To aid health care professionals in augmenting bone health and management of osteoporosis among adult individuals living with SCI/disease (SCI/D) and to prevent fractures and fracture-related morbidity and mortality and to ensure individuals with SCI have an adequate bone mass to allow participation in leisure-time weight-bearing activities without risk of injury. | Topic-specific | Health care workers                                                                                                  | SCI (adults 18+ with paralysis, excluding spinal stroke) | Acute<br>Chronic | Inpatient<br>Outpatient | 3 (9-11)              |
| 3   | German speaking society_Lifelong follow-up, 2022 | Lifelong follow-up care for people with spinal cord injury (Original title: <i>Lebenslange Nachsorge für Menschen mit Querschnittlähmung</i> ) | 2022 | German speaking society of spinal cord injury ( <i>Deutschsprachige Medizinische Gesellschaft für Paraplegiologie (DMPG)</i> ) | Austria, Germany, Switzerland | To describe the lifelong and holistic care of persons with paraplegia, specifically with regard to continuous quality improvement, taking into account individual needs, effectiveness, efficiency and appropriateness.                                                                                                                                                        | Comprehensive  | Health care workers<br>Individuals with SCI<br>Family and caregivers<br>Others <sup>d</sup>                          | SCI (adults)                                             | Chronic          | Outpatient              | 8 (12-19)             |
| 4   | Can-SCIP, 2021                                   | Canadian spinal cord injury practice (Can-SCIP) guideline                                                                                      | 2021 | Praxis Spinal Cord Institute                                                                                                   | Canada                        | First comprehensive living guideline designed to provide evidence-based recommendations for adults 18 years and older with a SCI in all phases of care (from pre-hospital emergency care through acute and rehabilitation care and on to community care), across an individual's lifetime.                                                                                     | Comprehensive  | Health care workers<br>Individuals with SCI<br>Family and caregivers <sup>e</sup><br>Policy makers<br>Administrators | TSCI (adults 18-65 years)                                | Acute<br>Chronic | Inpatient<br>Outpatient | 2 (20-21)             |
| 5   | Sekido N_Urinary dysfunction, 2020               | Clinical guidelines for the diagnosis and treatment of lower urinary tract dysfunction in patients with spinal cord injury                     | 2020 | Sekido N, Igawa Y, Kakizaki H, Kitta T, Sengoku A, Takahashi S, <i>et al.</i>                                                  | Japan                         | Offer clinical guidance for the the diagnosis and treatment of lower urinary tract dysfunction in patients with SCI. <sup>e</sup>                                                                                                                                                                                                                                              | Topic-specific | Health care workers                                                                                                  | SCI (adults with lower urinary tract dysfunction)        | Acute<br>Chronic | Inpatient<br>Outpatient | 1 (22)                |
| 6   | Consortium_Neurogenic bowel, 2020                | Management of neurogenic bowel                                                                                                                 | 2020 | Paralyzed Veterans of America and Consortium for                                                                               | USA                           | The overall aim was to improve the care of individuals with SCI by guiding clinicians and policy makers                                                                                                                                                                                                                                                                        | Topic-specific | Health care workers                                                                                                  | SCI (adults 18+ with paralysis,                          | Acute<br>Chronic | Inpatient<br>Outpatient | 3 (23-25)             |

|    |                                                  |                                                                                                                                                                                         |      |                                                                                                                                                                                                |                                                                                        |                                                                                                                                                                                                                                                                                                                                                                                                  |                |                                      |                           |               |                      |        |
|----|--------------------------------------------------|-----------------------------------------------------------------------------------------------------------------------------------------------------------------------------------------|------|------------------------------------------------------------------------------------------------------------------------------------------------------------------------------------------------|----------------------------------------------------------------------------------------|--------------------------------------------------------------------------------------------------------------------------------------------------------------------------------------------------------------------------------------------------------------------------------------------------------------------------------------------------------------------------------------------------|----------------|--------------------------------------|---------------------------|---------------|----------------------|--------|
|    |                                                  | dysfunction in adults after spinal cord injury: Clinical practice guideline for health care providers                                                                                   |      | Spinal Cord Medicine                                                                                                                                                                           |                                                                                        | with its recommendations. More specifically, to guide management decisions related to neurogenic bowel dysfunction.                                                                                                                                                                                                                                                                              |                |                                      | excluding spinal stroke)  |               |                      |        |
| 7  | Consortium_Autonomic dysreflexia, 2020           | Evaluation and management of autonomic dysreflexia and other autonomic dysfunctions: Preventing the highs and lows. Management of blood pressure, sweating, and temperature dysfunction | 2020 | Paralyzed Veterans of America and Consortium for Spinal Cord Medicine                                                                                                                          | USA                                                                                    | The overall aim was to improve the care of individuals with SCI (SCI) by guiding clinicians and policy makers with its recommendations. More specifically, to guide the prevention and treatment of autonomic dysreflexia and other autonomic dysfunctions in all settings, which can only result in the best outcomes and least amount of morbidity and mortality for those who experience SCI. | Topic-specific | Health care workers                  | SCI (adults and children) | Acute Chronic | Inpatient Outpatient | 1 (26) |
| 8  | MASCIP_Weight management, 2019                   | Multidisciplinary Association for Spinal Cord Injury Professions (MASCIP) guideline for weight management in individuals with spinal cord injury                                        | 2019 | Wong S, O'Connor L, Twist A, Moseley G, Langan R, Smith E, <i>et al.</i> as Multidisciplinary Association for Spinal Cord Injury Professions (MASCIP)                                          | Ireland, UK                                                                            | The overall aim was to improve the care of people with a SCI and to guide clinicians and policy makers through its recommendations. More specifically, to explore interventions that need to be tailored to the changed nutritional needs and physical activity following SCI and to explore their use for the treatment and management of overweight and obesity for people with a SCI.         | Topic-specific | Health care workers<br>Policy makers | SCI (adults)              | Acute Chronic | Inpatient Outpatient | 1 (27) |
| 9  | International Consultation on Incontinence, 2018 | Neurogenic bowel dysfunction: Clinical management recommendations of the Neurologic Incontinence Committee of the Fifth International Consultation on Incontinence 2013                 | 2018 | Cotterill N, Madersbacher H, Wyndaele JJ, Apostolidis A, Drake MJ, Gajewski J, <i>et al.</i> as Neurologic Incontinence Committee of the Fifth International Consultation on Incontinence 2013 | Austria, Belgium, Canada, Germany, Greece, Japan, Poland, Switzerland, Netherlands, UK | Update clinical management of neurogenic bowel dysfunction from the recommendations of the 4th International Consultation on Incontinence (ICI), 2009. The 4th ICI was organised to develop recommendations for the diagnosis evaluation and treatment of urinary incontinence, fecal incontinence, pelvic organ prolapse and bladder pain syndrome.                                             | Topic-specific | Health care workers <sup>e</sup>     | SCI and others            | Not described | Not described        | 1 (28) |
| 10 | UEMS_PRM, 2018                                   | Evidence-based position paper on Physical and Rehabilitation Medicine (PRM) professional practice for persons with                                                                      | 2018 | Rapidi CA, Tederko P, Moslavac S, Popa D, Branco CA, Kiekens C, <i>et al.</i> as UEMS PRM Section                                                                                              | Belgium, Croatia, Cyprus, Greece, Poland, Portugal, Romania, Spain                     | Improve Physical and Rehabilitation Medicine (PRM) physicians' professional practice for persons with SCI in order to improve their functionality, social and community reintegration, and to overcome activity limitations and/or participation restrictions.                                                                                                                                   | Comprehensive  | Health care workers                  | SCI                       | Acute Chronic | Inpatient Outpatient | 1 (29) |

|    |                                                   |                                                                                                                                                                             |      |                                                                                                                                    |                                          |                                                                                                                                                                                                                                                                                                                                                  |                |                                                                                                                                             |                                                                       |               |                      |           |
|----|---------------------------------------------------|-----------------------------------------------------------------------------------------------------------------------------------------------------------------------------|------|------------------------------------------------------------------------------------------------------------------------------------|------------------------------------------|--------------------------------------------------------------------------------------------------------------------------------------------------------------------------------------------------------------------------------------------------------------------------------------------------------------------------------------------------|----------------|---------------------------------------------------------------------------------------------------------------------------------------------|-----------------------------------------------------------------------|---------------|----------------------|-----------|
|    |                                                   | spinal cord injury. The European PRM position (UEMS PRM Section)                                                                                                            |      |                                                                                                                                    |                                          |                                                                                                                                                                                                                                                                                                                                                  |                |                                                                                                                                             |                                                                       |               |                      |           |
| 11 | International Continence Society_Uroynamics, 2018 | Urodynamics in patients with spinal cord injury: A clinical review and best practice paper by a working group of The International Continence Society Urodynamics Committee | 2018 | Schurch B, Iacovelli V, Averbeck MA, Carda S, Altaweel W, Finazzi E. as The International Continence Society Urodynamics Committee | Brazil, Italy, Saudi Arabia, Switzerland | To define the best clinical approach to SCI patient undergoing urodynamics and to clarify the role of urodynamics focusing on patients' assessment, indications, technical aspects, and follow-up.                                                                                                                                               | Topic-specific | Health care workers                                                                                                                         | SCI                                                                   | Acute Chronic | Inpatient Outpatient | 1 (30)    |
| 12 | Consortium_Cardiometabolic risk, 2018             | Identification and management of cardiometabolic risk after spinal cord injury: Clinical practice guideline for health care providers                                       | 2018 | Paralyzed Veterans of America and Consortium for Spinal Cord Medicine                                                              | USA                                      | The overall aim was to improve the care of patients with SCI by guiding clinicians and policymakers with its recommendations. More specifically, to guide cardiometabolic disease prevention and treatment in all settings, which can only result in the best outcomes and least amount of morbidity and mortality for those who experience SCI. | Topic specific | Health care workers<br>Individuals with SCI                                                                                                 | SCI (with paralysis since at least one year, excluding spinal stroke) | Acute Chronic | Inpatient Outpatient | 2 (31-32) |
| 13 | Consortium_Venous thromboembolism, 2016           | Prevention of venous thromboembolism in individuals with spinal cord injury: Clinical practice guidelines for health care providers.                                        | 2016 | Paralyzed Veterans of America and Consortium for Spinal Cord Medicine                                                              | USA                                      | The overall aim was to improve the care of patients with SCI and to provide guidance for clinicians and policymakers. More specifically, further standardization and improvement in the quality of clinical practice with the ultimate objective of optimizing outcomes for persons with SCI across the spectrum of their care.                  | Topic-specific | Health care workers                                                                                                                         | TSCI                                                                  | Acute         | Inpatient            | 1 (33)    |
| 14 | Consortium_Pressure ulcers, 2014                  | Pressure ulcer prevention and treatment following spinal cord injury: A clinical practice guideline for health-care professionals.                                          | 2014 | Paralyzed Veterans of America and Consortium for Spinal Cord Medicine                                                              | USA                                      | To present the current state of the science in pressure ulcer research and clinical practice and scientifically sound strategies that are effective in identifying risk and reducing the incidence, prevalence, and recurrence of this lifelong complication of SCI.                                                                             | Topic-specific | Health care workers<br>Individuals with SCI<br>Family and caregivers <sup>f</sup><br>Policy makers<br>Administrators<br>Others <sup>d</sup> | SCI                                                                   | Acute Chronic | Inpatient Outpatient | 1 (34)    |
| 15 | Canadian_Pressure ulcers, 2013                    | Canadian best practice guidelines for the prevention and management of pressure ulcers in people with                                                                       | 2013 | Houghton PE, Campbell KE and CPG Panel                                                                                             | Canada                                   | 1. To provide experts in SCI with the wound care information they require and wound care experts with the SCI information they need to deal effectively with this special population.                                                                                                                                                            | Topic-specific | Health care workers                                                                                                                         | SCI (with pressure ulcers)                                            | Acute Chronic | Inpatient Outpatient | 5 (35-39) |

spinal cord  
injury: A  
resource  
handbook for  
clinicians

2. To provide a common framework for spinal cord experts and wound care specialists that can improve communication between these groups. Improved communication can enhance pressure ulcer prevention and management strategies across the continuum of care for people with SCI, improving their quality of life and generating healthcare savings

3. To provide a very comprehensive approach to skin and wound care for the SCI population, which will ultimately help prevent and better manage pressure ulcers in this group of individuals.

|    |                                 |                                                                         |      |                                                          |     |                                                                                                                     |                |                                                                                             |                |         |            |        |
|----|---------------------------------|-------------------------------------------------------------------------|------|----------------------------------------------------------|-----|---------------------------------------------------------------------------------------------------------------------|----------------|---------------------------------------------------------------------------------------------|----------------|---------|------------|--------|
| 16 | NICE_Urinary incontinence, 2012 | Urinary incontinence in neurological disease: Assessment and management | 2012 | National Institute for Health and Care Excellence (NICE) | USA | To improve care by recommending specific treatments based on what symptoms and neurological conditions people have. | Topic-specific | Health care workers<br>Individuals with SCI<br>Family and caregivers<br>Others <sup>d</sup> | SCI and others | Chronic | Outpatient | 1 (40) |
|----|---------------------------------|-------------------------------------------------------------------------|------|----------------------------------------------------------|-----|---------------------------------------------------------------------------------------------------------------------|----------------|---------------------------------------------------------------------------------------------|----------------|---------|------------|--------|

<sup>a</sup>The description "SCI" includes both traumatic and non-traumatic SCIs, "TSCI" refers to traumatic SCIs only and "and others" means that SCIs were included among other health conditions. <sup>b</sup>N represents the number of ageing-specific recommendations included. The brackets indicate the number that refers to the ageing-specific recommendations found in Table 2. <sup>c</sup>Could be inferred from the guideline, however, it was not directly described. <sup>d</sup>Others included for example commissioners and providers, third-party payers or cost and decision makers. <sup>e</sup>Family and caregivers are not addressed directly as the CPG is not meant to be used for self-diagnosis or treatment, but as a baseline to bring health care workers attention to the topic. <sup>f</sup>There is also a consumer-specific guide.
