# Supplementary material for: Evidence-based recommendations for the rehabilitation and management of the ageing population with spinal cord injury: a systematic review of clinical practice guidelines
Source: PubMed Central journal article supplement — Eur J Phys Rehabil Med. 2024 Mar 29;60(3):433–44. doi: 10.23736/S1973-9087.24.08244-3 (PMC11255876; doi:10.23736/s1973-9087.24.08244-3), 2024-03-29
Supplement: Supplementary_Digital_Material8.pdf [file Supplementary_Digital_Material8.pdf]

SUPPLEMENTARY DIGITAL MATERIAL 8

Supplementary Table VIII.—Summary from recommendations organized by areas of interest and linked with relevant ICF codes.

| N°                                          | Key message for people ageing with an SCI                                                                                                                                                                                                                                                                  | SoR    | LoE      | (Health) issue(s) addressed                           | ICF codes                                                                           | Source Rec. N°<br>Guideline information                                                                                                          |
|---------------------------------------------|------------------------------------------------------------------------------------------------------------------------------------------------------------------------------------------------------------------------------------------------------------------------------------------------------------|--------|----------|-------------------------------------------------------|-------------------------------------------------------------------------------------|--------------------------------------------------------------------------------------------------------------------------------------------------|
| <b>Organization of healthcare services</b>  |                                                                                                                                                                                                                                                                                                            |        |          |                                                       |                                                                                     |                                                                                                                                                  |
| 1                                           | When caring for an older person with a newly acquired SCI, consider the assistance of a geriatrician (or orthogeriatrician, surgical liaison, or perioperative physician)                                                                                                                                  | Weak   | Very low | Service organization                                  | e355 Health professionals<br>e580 Health services, systems and policies             | Rec. N°:1<br>NICE_Rehabilitation, 2022<br>Chapter: 1.4 Developing a rehabilitation plan and making referrals<br>Page: 27                         |
| 2                                           | It is recommended that Physical and Rehabilitation Medicine (PRM) physicians continue long-term follow-up of persons with SCI, also when ageing, aiming to meet the individualized needs of the person using diverse treatment strategies along the lifespan of these persons with a life-long disability. | Strong | Very low | Service organization                                  | e355 Health professionals<br>e580 Health services, systems and policies             | Rec. N°:29<br>UEMS_PRM, 2018<br>Chapter: D. Recommendations on PRM management and process<br>Page: 804                                           |
| 3                                           | Referral to an endocrinologist or appropriate subspecialist should be considered if there are unexplained serum or urine calcium levels (hyper or hypo) and/or if the workup is suggestive of hyperthyroidism or hyperparathyroidism.                                                                      | Strong | Low      | Bone health                                           | s7700 Bones<br>b540 General metabolic functions                                     | Rec. N°:9<br>Consortium_Bone health, 2022<br>Chapter: 2. Laboratory screening<br>Page: 27                                                        |
| <b>Falls risk</b>                           |                                                                                                                                                                                                                                                                                                            |        |          |                                                       |                                                                                     |                                                                                                                                                  |
| 4                                           | When caring for an older person with a newly acquired SCI due to a traumatic injury, assess the person's fall risk according to national guidelines.                                                                                                                                                       | Strong | Very low | Falls risk assessment                                 | N/A                                                                                 | Rec. N°:3<br>NICE_Rehabilitation, 2022<br>Chapter: 1.4 Developing a rehabilitation plan and making referrals<br>Page: 27                         |
| <b>Prevention of deep venous thrombosis</b> |                                                                                                                                                                                                                                                                                                            |        |          |                                                       |                                                                                     |                                                                                                                                                  |
| 5                                           | In patients over 45 years of age, regularly ask about symptoms and assess for the presence of deep vein thrombosis.                                                                                                                                                                                        | Strong | Very low | Prevention of deep venous thrombosis                  | b415 Blood vessel functions                                                         | Rec. N°:15<br>German speaking society_Lifelong follow-up, 2022<br>Chapter: 3.3 Cardiovascular diseases<br>Page: 17                               |
| 6                                           | Anticoagulant thromboprophylaxis should be continued for at least eight weeks after injury in SCI patients with limited mobility, although the specific duration should be individualized for each patient. Older age is a factor suggesting the need for a longer duration of thromboprophylaxis.         | Strong | Low      | Prevention of deep venous thrombosis                  | b415 Blood vessel functions<br>e110 Products or substances for personal consumption | Rec. N°:33<br>Consortium_Venous thromboembolism, 2016<br>Chapter: Duration of Thromboprophylaxis<br>Page: 16                                     |
| <b>Prevention of herpes zoster</b>          |                                                                                                                                                                                                                                                                                                            |        |          |                                                       |                                                                                     |                                                                                                                                                  |
| 7                                           | Recommend vaccination to prevent herpes zoster and post-zoster neuralgia at least for high-risk patients starting at age 50.                                                                                                                                                                               | Strong | Very low | Prevention of herpes zoster and post-zoster neuralgia | b435 Immunological system functions                                                 | Rec. N°:17<br>German speaking society_Lifelong follow-up, 2022<br>Chapter: 3.6 Digestive system and neurogenic bowel dysfunction<br>Paragraph: 1 |

| <b>Cardiovascular health</b>     |                                                                                                                                                                                                                                                                                                                                                                                                                                                                                   |        |           |                                           |                                                                                                                           |                                                                                                                                  |
|----------------------------------|-----------------------------------------------------------------------------------------------------------------------------------------------------------------------------------------------------------------------------------------------------------------------------------------------------------------------------------------------------------------------------------------------------------------------------------------------------------------------------------|--------|-----------|-------------------------------------------|---------------------------------------------------------------------------------------------------------------------------|----------------------------------------------------------------------------------------------------------------------------------|
| 8                                | Monitor patients regularly for the development of cardiometabolic syndrome                                                                                                                                                                                                                                                                                                                                                                                                        | Strong | Very low  | Prevention of cardiometabolic syndrome    | b410 Heart functions<br>b540 General metabolic functions<br>b420 Blood pressure functions                                 | Rec. N°:12<br>German speaking society_Lifelong follow-up, 2022<br>Chapter: 3.3 Cardiovascular diseases<br>Page: 16               |
| 9                                | Assess nutritional status as part of lifelong follow-up for elevated cardiovascular risk factors                                                                                                                                                                                                                                                                                                                                                                                  | Weak   | Very low  | Assessment of cardiovascular risk factors | b410 Heart functions<br>b530 Weight maintenance functions<br>b540 General metabolic functions                             | Rec. N°:14<br>German speaking society_Lifelong follow-up, 2022<br>Chapter: 3.3 Cardiovascular diseases<br>Page: 16               |
| 10                               | From 10 years after the onset of paralysis or if the patient is over 60 years of age performance an annual ECG or consider a long-term ECG                                                                                                                                                                                                                                                                                                                                        | Weak   | Very low  | Prevention of cardiac infarction          | b410 Heart functions<br>e580 Health services, systems and policies                                                        | Rec. N°:13<br>German speaking society_Lifelong follow-up, 2022<br>Chapter: 3.3 Cardiovascular diseases<br>Page: 16               |
| 11                               | During physical rehabilitation offer aerobic exercise to older people who are frail after a traumatic SCI injury                                                                                                                                                                                                                                                                                                                                                                  | Strong | Very low  | Aerobic exercises                         | b455 Exercise tolerance functions<br>b410 Heart functions                                                                 | Rec. N°:5<br>NICE_Rehabilitation, 2022<br>Chapter: 1.11 Physical rehabilitation<br>Page: 60                                      |
| 12                               | Evidence-based guidelines for the treatment of hypertension in the general population should be used to treat individuals with SCI. In adults 60 years of age or older without diabetes or chronic kidney disease, initiate pharmacologic treatment to lower blood pressure if systolic blood pressure is 150 mm Hg or higher or diastolic blood pressure is 90 mm Hg or higher.                                                                                                  | Strong | Low       | Hypertension                              | b420 Blood pressure functions                                                                                             | Rec. N°:31<br>Consortium_Cardiometabolic risk, 2018<br>Chapter: Pharmacotherapy for Hypertension<br>Page: 28                     |
| 13                               | Use thiazide diuretics with caution in elderly patients. Evidence-based guidelines for the treatment of hypertension in the general population should be used to treat individuals with SCI. However, SCI-related factors should be considered when selecting an antihypertensive agent, such as the effect of thiazide diuretics on bladder management. Elderly patients may be particularly susceptible to renal electrolyte disturbances, gout, hyperglycemia and hypotension. | Strong | Very low  | Hypertension                              | b420 Blood pressure functions<br>b540 General metabolic functions<br>e110 Products or substances for personal consumption | Rec. N°:32<br>Consortium_Cardiometabolic risk, 2018<br>Chapter: Pharmacotherapy for Hypertension<br>Page: 28                     |
| <b>Bone and metabolic health</b> |                                                                                                                                                                                                                                                                                                                                                                                                                                                                                   |        |           |                                           |                                                                                                                           |                                                                                                                                  |
| 14                               | When caring for an older person with a newly acquired SCI due to a fragility fracture, assess bone health according to national guidelines for osteoporosis and refer as appropriate.                                                                                                                                                                                                                                                                                             | Strong | Very low  | Bone health                               | s7700 Bones                                                                                                               | Rec. N°:2<br>NICE_Rehabilitation, 2022<br>Chapter: 1.4 Developing a rehabilitation plan and making referrals<br>Page: 27         |
| 15                               | Use the following criteria to diagnose sublesional osteoporosis: Males $\geq$ 50 years of age or postmenopausal females: Hip (total or femoral neck), distal femur, or proximal tibia T-score $\leq$ -2.5                                                                                                                                                                                                                                                                         | Strong | Mode rate | Bone health                               | s7700 Bones                                                                                                               | Rec. N°:10<br>Consortium_Bone health, 2022<br>Chapter: 3. Bone density testing with dual-energy X-ray absorptiometry<br>Page: 36 |

|    |                                                                                                                                                                                                                                                                                                                                                                                                                                                                                                                                                                                                                                                                                                                                 |        |           |                                       |                                                                                                                                                                         |                          |                                                                                                                   |
|----|---------------------------------------------------------------------------------------------------------------------------------------------------------------------------------------------------------------------------------------------------------------------------------------------------------------------------------------------------------------------------------------------------------------------------------------------------------------------------------------------------------------------------------------------------------------------------------------------------------------------------------------------------------------------------------------------------------------------------------|--------|-----------|---------------------------------------|-------------------------------------------------------------------------------------------------------------------------------------------------------------------------|--------------------------|-------------------------------------------------------------------------------------------------------------------|
| 16 | When caring for an older person with a newly acquired SCI due to a fragility fracture, measure vitamin D levels (Low vitamin D = 25 hydroxyvitamin D below 25 nmol/litre (or 10 ng/ml).                                                                                                                                                                                                                                                                                                                                                                                                                                                                                                                                         | Weak   | Very low  | Bone health                           | s7700 Bones<br>b540 General functions                                                                                                                                   | metabolic                | Rec. N°:6<br>NICE_Rehabilitation, 2022<br>Chapter: 1.11 Physical rehabilitation<br>Page: 60                       |
| 17 | Consider daily supplement of 10 micrograms (or 400 IU) of vitamin D.                                                                                                                                                                                                                                                                                                                                                                                                                                                                                                                                                                                                                                                            | Weak   | Very low  | Bone health                           | s7700 Bones<br>b540 General functions                                                                                                                                   | metabolic                | Rec. N°:6<br>NICE_Rehabilitation, 2022<br>Chapter: 1.11 Physical rehabilitation<br>Page: 60                       |
| 18 | As soon as possible after the patient establishes ongoing care with their physician, or if there is significant loss of bone mineral density, an incident fracture, or a change in a medical condition or medication that might be expected to influence osteoporosis risk: Measurements of serum 25-hydroxyvitamin D (25-(OH)D) done by a validated assay method; complete blood cell count; ionized calcium (or calcium adjusted for albumin), phosphate, intact parathyroid hormone, creatinine (and estimated glomerular filtration rate), bone-specific alkaline phosphatase and transaminases, hemoglobin A1C, and thyroid-stimulating hormone levels; and 24-hour urine collection for calcium and creatinine excretion. | Strong | Low       | Bone health                           | s7700 Bones<br>b540 General functions                                                                                                                                   | metabolic                | Rec. N°:9<br>Consortium_Bone health, 2022<br>Chapter: 2. Laboratory screening<br>Page: 27                         |
| 19 | Referral to an endocrinologist or appropriate subspecialist should be considered if there are unexplained serum or urine calcium levels (hyper or hypo) and/or if the workup is suggestive of hyperthyroidism or hyperparathyroidism.                                                                                                                                                                                                                                                                                                                                                                                                                                                                                           | Strong | Low       | Bone health                           | s7700 Bones<br>b540 General functions                                                                                                                                   | metabolic                | Rec. N°:9<br>Consortium_Bone health, 2022<br>Chapter: 2. Laboratory screening<br>Page: 27                         |
| 20 | Patients who are not hypercalcemic should have the following calcium intake as a combination of food and supplements (preference for dietary intake over supplements).<br>Men 50-70 years: 1,000 mg/day<br>Women 50-70 years: 1,000-1,200 mg/day<br>Men and women 71+ years: 1,000-1,200 mg/day                                                                                                                                                                                                                                                                                                                                                                                                                                 | Strong | Mode rate | Bone health                           | s7700 Bones<br>b540 General functions                                                                                                                                   | metabolic                | Rec. N°:11<br>Consortium_Bone health, 2022<br>Chapter: 5. Calcium and vitamin D3: diet or supplements<br>Page: 48 |
| 21 | When caring for an frail person with a newly acquired SCI consider supplementation of dietary protein (0.8 to 1.5 g protein (0.13 to 0.24 g nitrogen)/kg/day)                                                                                                                                                                                                                                                                                                                                                                                                                                                                                                                                                                   | Weak   | Very low  | Protein metabolism                    | b530 Weight functions<br>b540 General functions                                                                                                                         | maintenance<br>metabolic | Rec. N°:7<br>NICE_Rehabilitation, 2022<br>Chapter: 1.11 Physical rehabilitation<br>Page: 60                       |
| 22 | If Orlistat is used for the treatment of obesity in older patients, provide multivitamin and mineral supplement                                                                                                                                                                                                                                                                                                                                                                                                                                                                                                                                                                                                                 | Weak   | Very low  | Obesity                               | b530 Weight functions<br>b540 General functions<br>e110 Products or substances for personal consumption                                                                 | maintenance<br>metabolic | Rec. N°:27<br>MASCIP_Weight management, 2019<br>Chapter: Medical and Surgical interventions<br>Page: 12           |
| 23 | Educate women with SCI about the effects of perimenopausal and menopausal changes on sexual function, bone health, accelerated metabolic aging, and metabolic syndrome after SCI.                                                                                                                                                                                                                                                                                                                                                                                                                                                                                                                                               | Strong | Very low  | Perimenopausal and menopausal changes | b640 Sexual functions<br>b670 Sensations associated with genital and reproductive functions<br>s7700 Bones<br>b540 General functions<br>d570 Looking after one's health | metabolic                | Rec. N°:21<br>Can-SCIP, 2021<br>Chapter: R. Sexual health & relationships<br>Section: R12.7                       |

| <b>Bowel health</b>   |                                                                                                                                                                                                                                                                                                                                                                                                                                                                                                                       |                          |           |                                                 |                                                                                                                              |                                                                                                                                                               |
|-----------------------|-----------------------------------------------------------------------------------------------------------------------------------------------------------------------------------------------------------------------------------------------------------------------------------------------------------------------------------------------------------------------------------------------------------------------------------------------------------------------------------------------------------------------|--------------------------|-----------|-------------------------------------------------|------------------------------------------------------------------------------------------------------------------------------|---------------------------------------------------------------------------------------------------------------------------------------------------------------|
| 24                    | If a high-fiber diet is considered necessary, the recommended daily amount for men and women over 50 is 21 g for women and 30 g for men. People with SCI should not automatically be placed on a high-fiber diet. Increases in dietary or supplemental fiber should be done gradually to assess tolerance.                                                                                                                                                                                                            | Strong                   | Low       | Constipation                                    | b525 Defecation functions                                                                                                    | Rec. N°:23<br>Consortium_Neurogenic bowel, 2020<br>Chapter: 4. Diet, supplements, fiber, fluids, and probiotics<br>Page: 27                                   |
| 25                    | Oral medications may be used for bowel management; however, the evidence for their use is limited and there are no data to suggest the use of one medication over another. If prucalopride is used, the dose should be halved for people over 60 years of age (1 mg per day).                                                                                                                                                                                                                                         | Strong                   | Low       | Constipation                                    | b525 Defecation functions<br>e110 Products or substances for personal consumption                                            | Rec. N°:24<br>Consortium_Neurogenic bowel, 2020<br>Chapter: 5. Oral medications<br>Page: 30                                                                   |
| 26                    | In general, enema formulations such as sodium phosphate (phosphosoda), soapsuds, or milk and molasses are not recommended, but may be useful in selected individuals. Physicians should be consulted prior to the use of sodium phosphate enemas in individuals over the age of 55.                                                                                                                                                                                                                                   | Strong                   | Very low  | Constipation                                    | b525 Defecation functions<br>e110 Products or substances for personal consumption                                            | Rec. N°:25<br>Consortium_Neurogenic bowel, 2020<br>Chapter: 6. Use of suppositories, enemas, and irrigation<br>Page: 34                                       |
| 27                    | Postanal repair for fecal incontinence is particularly useful in the elderly or those with significant comorbidities.                                                                                                                                                                                                                                                                                                                                                                                                 | Weak                     | Very low  | Faecal incontinence                             | b525 Defecation functions<br>d530 Toileting                                                                                  | Rec. N°:28<br>International Consultation on Incontinence, 2018<br>Chapter: Surgical treatment<br>Page: 52                                                     |
| 28                    | Undertake colonoscopy for colorectal cancer at the same screening recommendations as the general population from the age of 50 years, with follow-up every 10 years thereafter, or earlier depending on findings. Colonoscopy should be performed in a hospital setting for people with SCI higher than T6, flaccid SCI and those with severely restricted mobility. Bowel preparation begins on the day of admission and lasts three to four days. The patient should be observed for one night after the procedure. | Strong                   | Very low  | Colorectal Cancer Screening                     | s540 Structure of intestine<br>e580 Health services, systems and policies                                                    | Rec. N°:18<br>German speaking society_Lifelong follow-up, 2022<br>Chapter: 3.6 Digestive system and neurogenic bowel dysfunction<br>Paragraph: 1<br>Page: 23  |
| <b>Bladder health</b> |                                                                                                                                                                                                                                                                                                                                                                                                                                                                                                                       |                          |           |                                                 |                                                                                                                              |                                                                                                                                                               |
| 29                    | Educate individuals with SCI and their families about the risk of bladder cancer, the symptoms to watch for (including recurrent infections, recurrent catheter blockages, or hematuria), and the need to seek medical care.                                                                                                                                                                                                                                                                                          | Weak/Strong <sup>a</sup> | Very low  | Bladder cancer screening                        | s610 Structure of urinary system<br>d570 Looking after one's health                                                          | Rec. N°:20 and 40<br>Can-SCIP, 2021<br>Chapter: K. Bladder function<br>Section: K.16.1<br>AND<br>NICE_Urinary incontinence, 2012<br>Chapter: 1.10<br>Page: 39 |
| 30                    | When using anticholinergics to improve detrusor overactivity and/or bladder compliance, consider the total anticholinergic load to avoid cognitive impairment. Anticholinergics are recommended for patients with risk factors for renal impairment and symptomatic urinary tract infection or urinary incontinence.                                                                                                                                                                                                  | Strong                   | Mode rate | Detrusor overactivity and/or bladder compliance | b610 Urinary excretory functions<br>s610 Structure of urinary system<br>e110 Products or substances for personal consumption | Rec. N°:22<br>Sekido N_Urinary dysfunction, 2020<br>Chapter: 3. Pharmacological therapy<br>Page: 283                                                          |
| 31                    | Referral to a nephrologist should be considered in those with chronic kidney disease stage 4 (CKD 4) (glomerular filtration rate [GFR] 15-29                                                                                                                                                                                                                                                                                                                                                                          | Strong                   | Low       | Chronic Kidney Disease                          | b610 Urinary excretory functions                                                                                             | Rec. N°:9<br>Consortium_Bone health, 2022<br>Chapter: 2. Laboratory screening                                                                                 |

|                    |                                                                                                                                                                                                                                                                                                                                                                                                                                                                                                                                                                                                      |               |                                         |                                                       |                                                                                                                                                              |                                                                                                                                  |
|--------------------|------------------------------------------------------------------------------------------------------------------------------------------------------------------------------------------------------------------------------------------------------------------------------------------------------------------------------------------------------------------------------------------------------------------------------------------------------------------------------------------------------------------------------------------------------------------------------------------------------|---------------|-----------------------------------------|-------------------------------------------------------|--------------------------------------------------------------------------------------------------------------------------------------------------------------|----------------------------------------------------------------------------------------------------------------------------------|
|                    | mL/min) and CKD 5 (GFR 15 mL/min or less) or unexplained renal impairment.                                                                                                                                                                                                                                                                                                                                                                                                                                                                                                                           |               |                                         |                                                       | e580 Health services, systems and policies                                                                                                                   | Page: 27                                                                                                                         |
| 32                 | Always monitor blood pressure during urodynamic. Special care should be taken of patients at risk for autonomic dysreflexia (mainly patients with SCI above T6), being aware of the clinical signs of the onset of the crisis (eg, head sweating, headache) and its management (stop the filling, tilting the table, nifedipine).                                                                                                                                                                                                                                                                    | Strong        | No classification possible <sup>b</sup> | Prevention of autonomic dysreflexia during urodynamic | s610 Structure of urinary system<br>b420 Blood pressure functions                                                                                            | Rec. N°:30<br>International Continence Society_Urodynamics, 2018<br>Chapter: Urodynamics in SCI<br>Paragraph: 3.3.2<br>Page: 586 |
| 33                 | When performing a urodynamic study in older men, especially those with a history of prostatic hypertrophy or transurethral resection of the prostate, use a Coudé catheter to reduce the risk of autonomic dysreflexia.                                                                                                                                                                                                                                                                                                                                                                              | Strong        | Very low                                | Prevention of autonomic dysreflexia during urodynamic | s610 Structure of urinary system<br>b420 Blood pressure functions                                                                                            | Rec. N°:26<br>Consortium_Autonomic dysreflexia, 2020<br>Chapter: Autonomic Dysreflexia<br>Page: 23                               |
| <b>Skin health</b> |                                                                                                                                                                                                                                                                                                                                                                                                                                                                                                                                                                                                      |               |                                         |                                                       |                                                                                                                                                              |                                                                                                                                  |
| 34                 | When assessing pressure ulcer risk, use both a validated risk assessment tool and clinical judgment to assess risk. Evidence suggests that the number and severity of pressure ulcers increase as people with SCI age, particularly after the age of 40.                                                                                                                                                                                                                                                                                                                                             | Strong        | High to low                             | Prevention of pressure injuries                       | b810 Protective functions of the skin<br>b820 Repair functions of the skin<br>b830 Other functions of the skin                                               | Rec. N°:34<br>Consortium_Pressure ulcers, 2014<br>Chapter: Risk and Risk assessment<br>Page: 11                                  |
| 35                 | Perform a comprehensive assessment of posture and positioning to evaluate pressure ulcer risk using the 24-hour approach. Physical changes that typically occur with increasing duration of spinal cord injury and with aging (changes in function, strength, and mobility) increase pressure ulcer risk and may require more intensive pressure ulcer management practices.                                                                                                                                                                                                                         | Not described | Very low                                | Prevention of pressure injuries                       | b810 Protective functions of the skin<br>b820 Repair functions of the skin<br>b830 Other functions of the skin                                               | Rec. N°:35<br>Canadian_Pressure ulcers, 2013<br>Chapter: 24-hour approach to pressure ulcer risk management<br>Page: 70          |
| 36                 | Reassess pressure management using a 24-hour approach every 2 years, or more often if a pressure ulcer develops or there is a significant change in health status. Reassessment of pressure management using a 24-hour approach is important to identify the impact of physical changes due to aging and increasing duration of spinal cord injury, including postural changes, muscle wasting, and spasticity.                                                                                                                                                                                      | Not described | Very low                                | Prevention of pressure injuries                       | b810 Protective functions of the skin<br>b820 Repair functions of the skin<br>b830 Other functions of the skin<br>e580 Health services, systems and policies | Rec. N°:36<br>Canadian_Pressure ulcers, 2013<br>Chapter: Reassessment<br>Page: 77                                                |
| 37                 | Schedule for periodic reassessment of performance of sitting support surfaces specific to pressure ulcer prevention and treatment at least every 2 years, or sooner if any of the following occur: changes in health status, including weight or medical changes, changes in functional status, equipment wear or deterioration, pressure ulcer development, changes in living situation. Changes in equipment, support surfaces, and pressure management strategies may be necessary to accommodate changes in physical status associated with aging and increasing duration of spinal cord injury. | Not described | Very low                                | Prevention of pressure injuries                       | b810 Protective functions of the skin<br>b820 Repair functions of the skin<br>b830 Other functions of the skin                                               | Rec. N°:39<br>Canadian_Pressure ulcers, 2013<br>Chapter: Reassessment of seating systems<br>Page: 127                            |
| 38                 | Educate the person with SCI to regularly monitor the condition of the seating and support surfaces to ensure that the equipment remains effective for pressure management. Regular reassessment becomes even                                                                                                                                                                                                                                                                                                                                                                                         | Not described | Very low                                | Prevention of pressure injuries                       | b810 Protective functions of the skin                                                                                                                        | Rec. N°:37<br>Canadian_Pressure ulcers, 2013<br>Chapter: Reassessment of seating systems                                         |

|                                        |                                                                                                                                                                                                                                                                                                                                                                                                                                                                                                                                                                                       |               |          |                                 |                                                                                                                                                           |                                                                                                                                                                                                                    |
|----------------------------------------|---------------------------------------------------------------------------------------------------------------------------------------------------------------------------------------------------------------------------------------------------------------------------------------------------------------------------------------------------------------------------------------------------------------------------------------------------------------------------------------------------------------------------------------------------------------------------------------|---------------|----------|---------------------------------|-----------------------------------------------------------------------------------------------------------------------------------------------------------|--------------------------------------------------------------------------------------------------------------------------------------------------------------------------------------------------------------------|
|                                        | more important over time. Many physical changes, including long-term postural changes, aging, and new comorbidities, can affect pressure ulcer risk.                                                                                                                                                                                                                                                                                                                                                                                                                                  |               |          |                                 | b820 Repair functions of the skin<br>b830 Other functions of the skin<br>d570 Looking after one's health                                                  | Page: 127                                                                                                                                                                                                          |
| 39                                     | Educate the person with SCI and caregiver about cushion maintenance, including: care and maintenance of the wheelchair cushion; monitoring the cushion for signs of wear at appropriate intervals; proper positioning of the cushion, including orientation and monitoring for bottoming; replacing the cushion if it deteriorates; avoiding additional layers on top of the cushion unless deemed necessary. Skin changes associated with aging can increase susceptibility to pressure ulcer development, and routine reassessment can ensure that the cushion remains appropriate. | Not described | Very low | Prevention of pressure injuries | b810 Protective functions of the skin<br>b820 Repair functions of the skin<br>b830 Other functions of the skin<br>d570 Looking after one's health         | Rec. N°:38<br>Canadian_Pressure ulcers, 2013<br>Chapter: Wheelchair cushions<br>Page: 120                                                                                                                          |
| <b>Health of the upper extremities</b> |                                                                                                                                                                                                                                                                                                                                                                                                                                                                                                                                                                                       |               |          |                                 |                                                                                                                                                           |                                                                                                                                                                                                                    |
| 40                                     | Perform annual examination of upper extremities (especially shoulder, elbow, wrist, and carpal tunnel syndrome)                                                                                                                                                                                                                                                                                                                                                                                                                                                                       | Strong        | Very low | Health of the upper extremities | s720 Structure of shoulder region<br>s730 Structure of upper extremity<br>e580 Health services, systems and policies                                      | Rec. N°:19<br>German speaking society_Lifelong follow-up, 2022<br>Chapter: 3.10 Musculoskeletal system<br>Page: 31                                                                                                 |
| <b>Respiratory sleep disorders</b>     |                                                                                                                                                                                                                                                                                                                                                                                                                                                                                                                                                                                       |               |          |                                 |                                                                                                                                                           |                                                                                                                                                                                                                    |
| 41                                     | Regularly assess the presence of symptoms of respiratory disorders during sleep and, if necessary, perform polygraphy/polysomnography.                                                                                                                                                                                                                                                                                                                                                                                                                                                | Weak          | Very low | Screening for sleep disorders   | b440 Respiration functions<br>b445 Respiratory muscle functions<br>b450 Additional respiratory functions                                                  | Rec. N°:16<br>German speaking society_Lifelong follow-up, 2022<br>Chapter: 3.4 Respiratory system - respiration, ventilation, respiratory infections and sleep-related breathing disorders (b440-b449)<br>Page: 17 |
| <b>Assistive Technologies</b>          |                                                                                                                                                                                                                                                                                                                                                                                                                                                                                                                                                                                       |               |          |                                 |                                                                                                                                                           |                                                                                                                                                                                                                    |
| 42                                     | Spinal orthoses (for example, cervical collar or thoraco-lumbar spinal orthosis) should be used with caution, as these devices may be poorly tolerated by older people.                                                                                                                                                                                                                                                                                                                                                                                                               | Weak          | Very low | Spinal orthoses                 | e115 Products and technology for personal use in daily living                                                                                             | Rec. N°:4<br>NICE_Rehabilitation, 2022<br>Chapter: 1.11 Physical rehabilitation<br>Page: 57                                                                                                                        |
| 43                                     | If and older person is using an spinal orthosis (for example, cervical collar or thoraco-lumbar spinal orthosis), regularly assess them for complications such as pain, pressure sores, swallowing or breathing difficulties                                                                                                                                                                                                                                                                                                                                                          | Strong        | Very low | Spinal orthoses                 | e115 Products and technology for personal use in daily living                                                                                             | Rec. N°:8<br>NICE_Rehabilitation, 2022<br>Chapter: 1.15 Rehabilitation after spinal cord injury<br>Page: 77                                                                                                        |
| 44                                     | Educate the person with SCI and caregiver about cushion maintenance, including: care and maintenance of the wheelchair cushion; monitoring the cushion for signs of wear at appropriate intervals; proper positioning of the cushion, including orientation and monitoring for bottoming; replacing the cushion if it deteriorates; avoiding additional layers on top of the cushion unless deemed necessary. Skin changes associated with                                                                                                                                            | Not described | Very low | Prevention of pressure injuries | e115 Products and technology for personal use in daily living<br>e120 Products and technology for personal indoor and outdoor mobility and transportation | Rec. N°:38<br>Canadian_Pressure ulcers, 2013<br>Chapter: Wheelchair cushions<br>Page: 120                                                                                                                          |

|                                                                                                                                                                                                                                                                                                                                                                                                                                                                                                                                                                                                                                                                                                                                                                                                                                                                                                                                                                                                                                                                                                        |                                                                                                                                                                                                                                                                                                                                                                                                                                                                                                                                                                                                      |               |          |                                 |                                                                                                                                                                                                         |                                                                                                       |
|--------------------------------------------------------------------------------------------------------------------------------------------------------------------------------------------------------------------------------------------------------------------------------------------------------------------------------------------------------------------------------------------------------------------------------------------------------------------------------------------------------------------------------------------------------------------------------------------------------------------------------------------------------------------------------------------------------------------------------------------------------------------------------------------------------------------------------------------------------------------------------------------------------------------------------------------------------------------------------------------------------------------------------------------------------------------------------------------------------|------------------------------------------------------------------------------------------------------------------------------------------------------------------------------------------------------------------------------------------------------------------------------------------------------------------------------------------------------------------------------------------------------------------------------------------------------------------------------------------------------------------------------------------------------------------------------------------------------|---------------|----------|---------------------------------|---------------------------------------------------------------------------------------------------------------------------------------------------------------------------------------------------------|-------------------------------------------------------------------------------------------------------|
|                                                                                                                                                                                                                                                                                                                                                                                                                                                                                                                                                                                                                                                                                                                                                                                                                                                                                                                                                                                                                                                                                                        | aging can increase susceptibility to pressure ulcer development, and routine reassessment can ensure that the cushion remains appropriate.                                                                                                                                                                                                                                                                                                                                                                                                                                                           |               |          |                                 |                                                                                                                                                                                                         |                                                                                                       |
| 45                                                                                                                                                                                                                                                                                                                                                                                                                                                                                                                                                                                                                                                                                                                                                                                                                                                                                                                                                                                                                                                                                                     | Schedule for periodic reassessment of performance of sitting support surfaces specific to pressure ulcer prevention and treatment at least every 2 years, or sooner if any of the following occur: changes in health status, including weight or medical changes, changes in functional status, equipment wear or deterioration, pressure ulcer development, changes in living situation. Changes in equipment, support surfaces, and pressure management strategies may be necessary to accommodate changes in physical status associated with aging and increasing duration of spinal cord injury. | Not described | Very low | Prevention of pressure injuries | e115 Products and technology for personal use in daily living<br>e120 Products and technology for personal indoor and outdoor mobility and transportation<br>e580 Health services, systems and policies | Rec. N°:39<br>Canadian_Pressure ulcers, 2013<br>Chapter: Reassessment of seating systems<br>Page: 127 |
| <p><sup>a</sup>The same recommendation was found in two guidelines. The original recommendation was developed by the NICE guideline "Urinary incontinence in neurological disease: Assessment and management" and adapted with a different strength of recommendation by the Canadian Spinal Cord Injury Practice (Can-SCIP) guideline (2021).</p> <p><sup>b</sup>The guideline states that recommendations are graded according to the European Association of Urology (EAU) classification system, modified from the Oxford Centre for Evidence-Based Medicine Levels of Evidence and the Grading of Recommendations Assessment, Development and Evaluation (GRADE) approach. However, the link provided in the guideline is no longer available. The current version (March 2022) of the Guidelines Office Development Handbook from the European Association of Urology is not consistent with the gradings given in the guideline. The strength of the recommendation in this guideline was inferred from the wording of the recommendation (e.g., we recommend = strong, we suggest = weak).</p> |                                                                                                                                                                                                                                                                                                                                                                                                                                                                                                                                                                                                      |               |          |                                 |                                                                                                                                                                                                         |                                                                                                       |
