# Supplementary figures and images for: Evidence-based recommendations for the rehabilitation and management of the ageing population with spinal cord injury: a systematic review of clinical practice guidelines
Source: PubMed Central journal article supplement — Eur J Phys Rehabil Med. 2024 Mar 29;60(3):433–44. doi: 10.23736/S1973-9087.24.08244-3 (PMC11255876; doi:10.23736/s1973-9087.24.08244-3), 2024-03-29

SUPPLEMENTARY DIGITAL MATERIAL 1

Supplementary Table I.--Eligibility criteria.

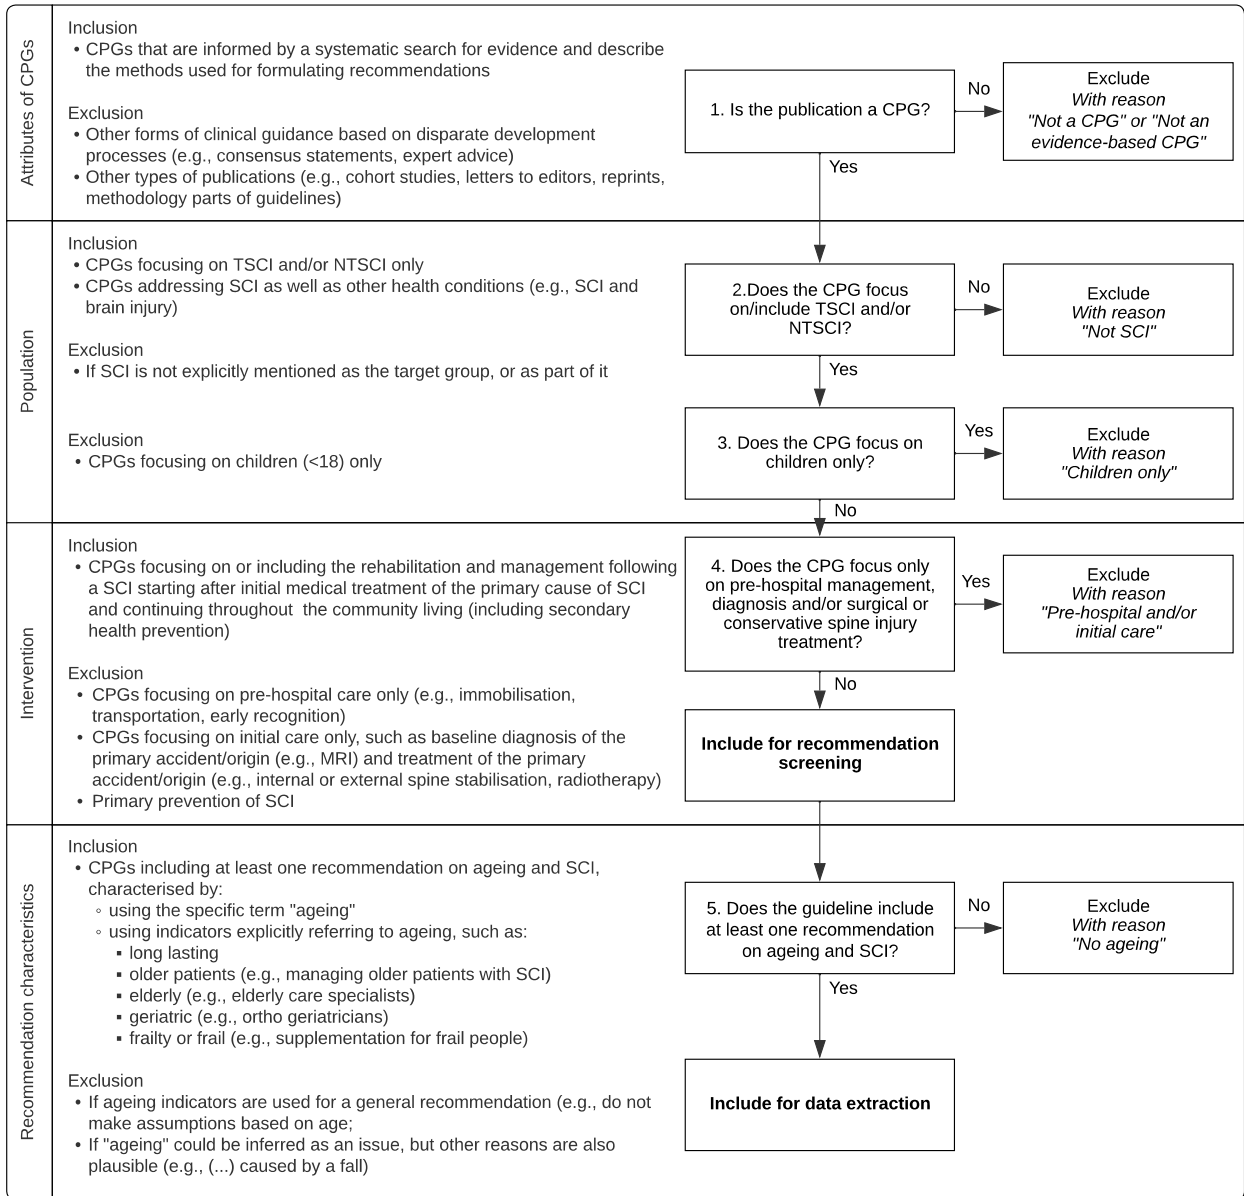

Supplement: Supplementary_Digital_Material1.pdf [file Supplementary_Digital_Material1.pdf]
